# Supplementary material for: Secondary organic moiety templated organic–inorganic polyoxometalate-based frameworks
Source: Royal Society of Chemistry journal article supplement (doi:10.1039/c4ce02043j), 2014-12-17
Supplement: c4ce02043j1.pdf [file c4ce02043j1.pdf]

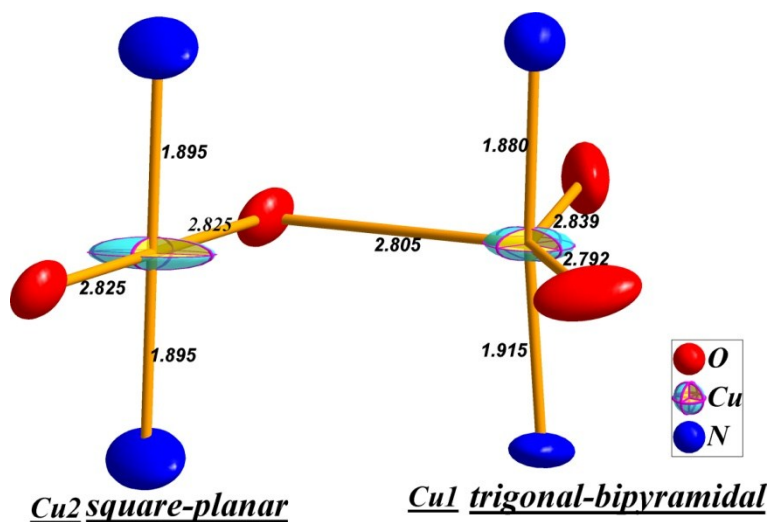

Fig. s1 the coordination spheres of Cu(1) and Cu(2) in compound 1.

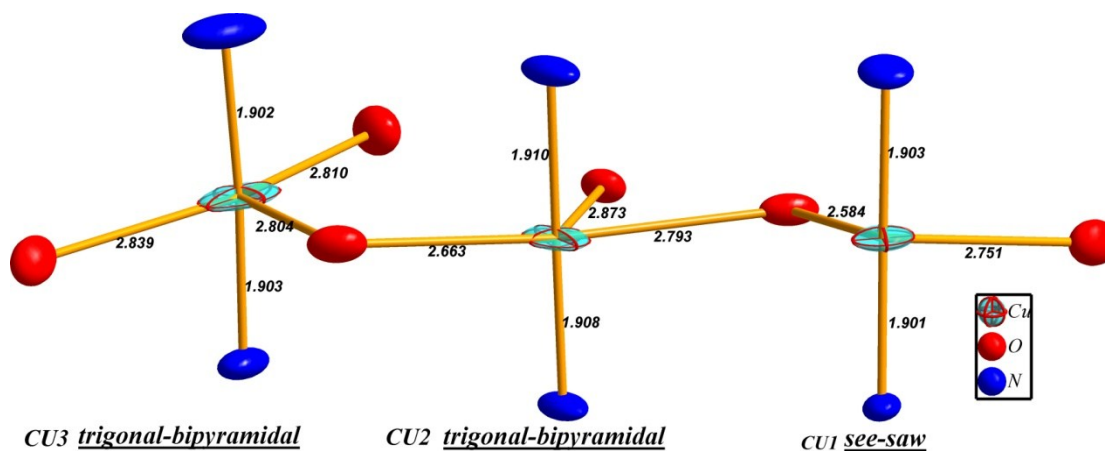

Fig. s2 the coordination spheres of Cu(1), Cu(2) and Cu(3) in compound 2.

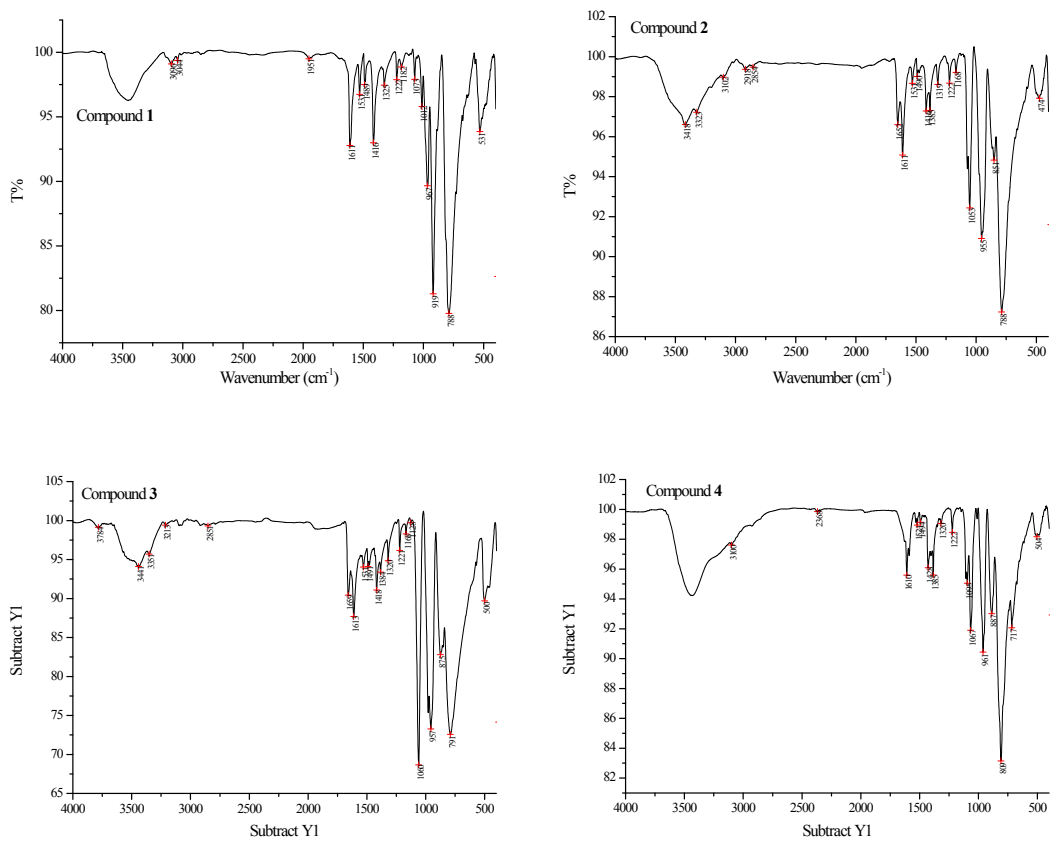

Fig. s3 IR spectra of compounds 1-4.

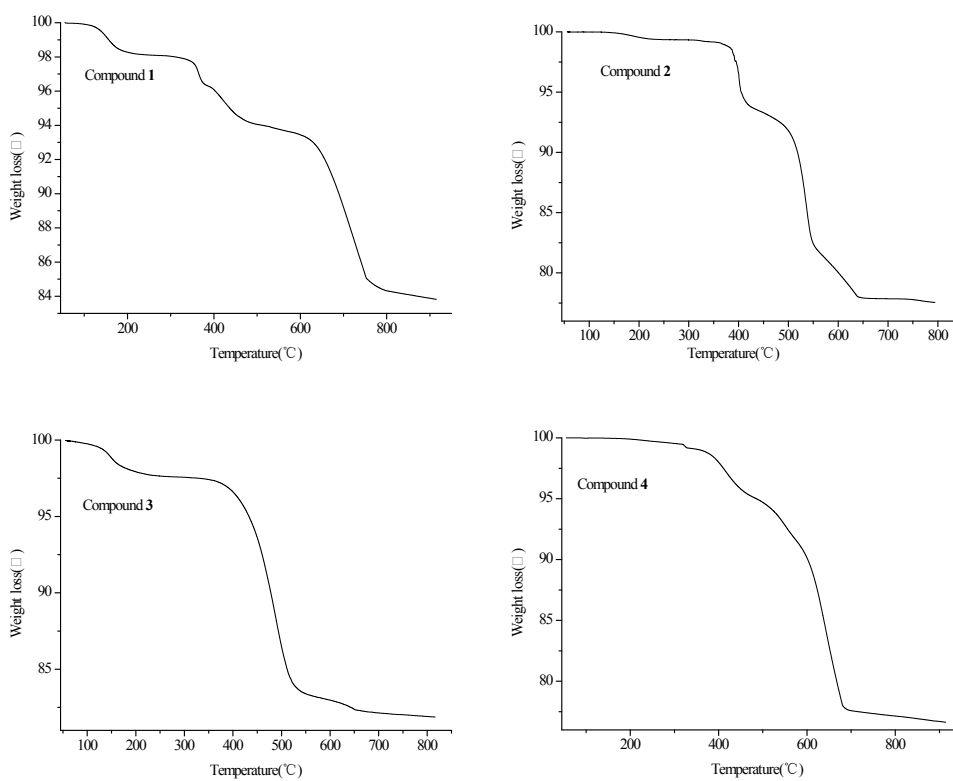

Fig. s4 TG curves of compounds 1-4.

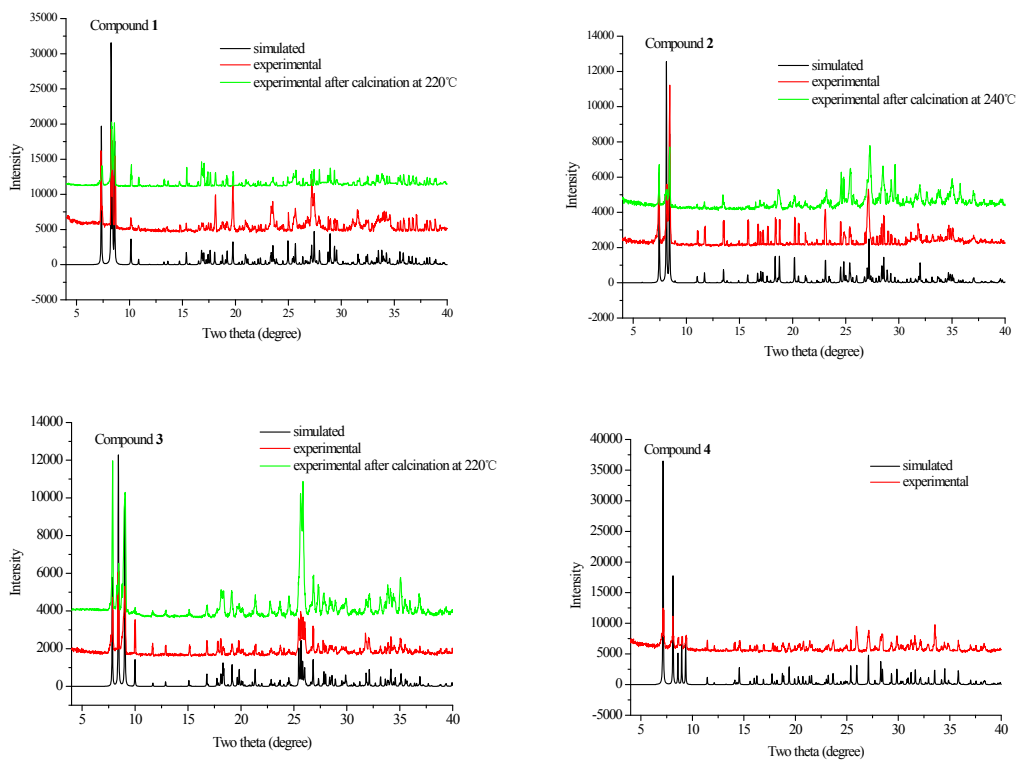

Fig. s5. XRD patterns of compounds 1-4.

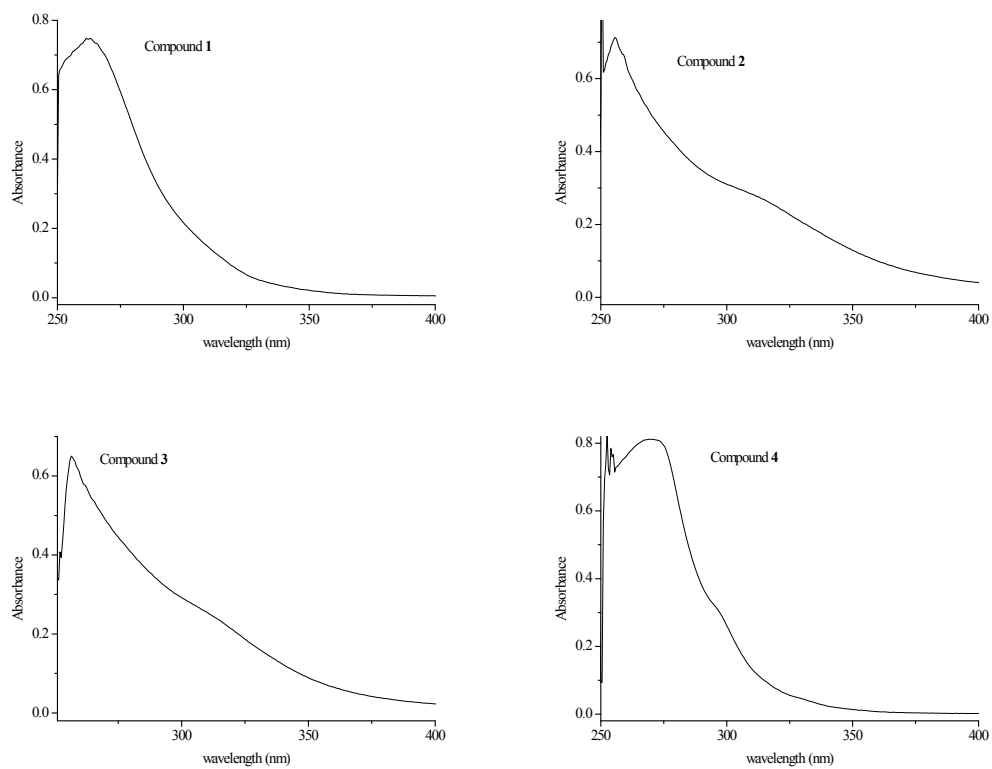

Fig. s6 UV spectra of compounds 1-4.

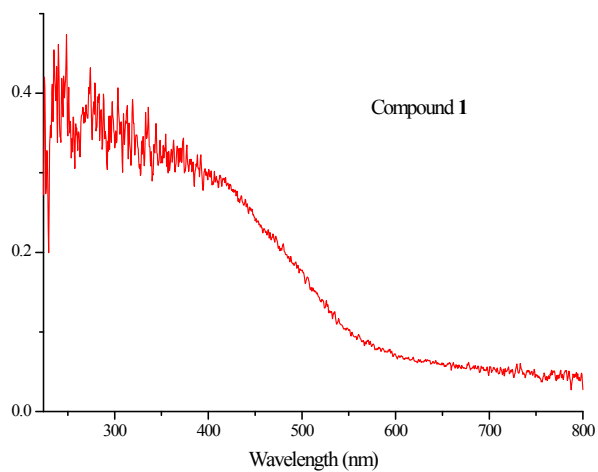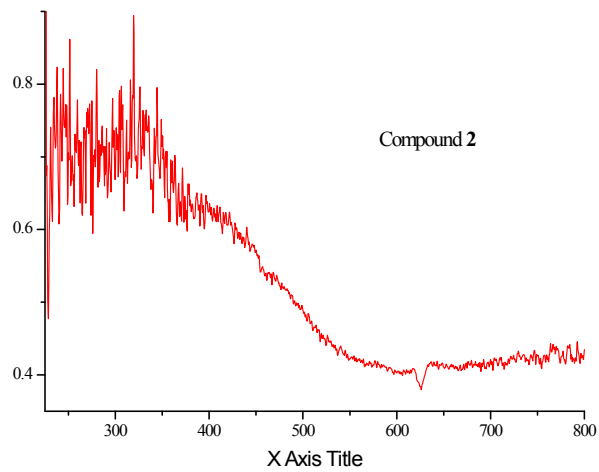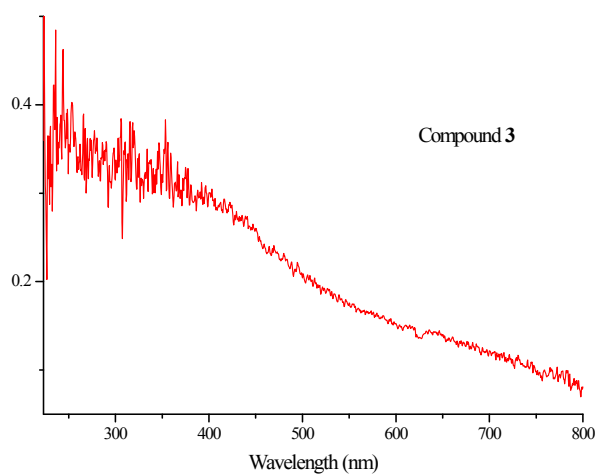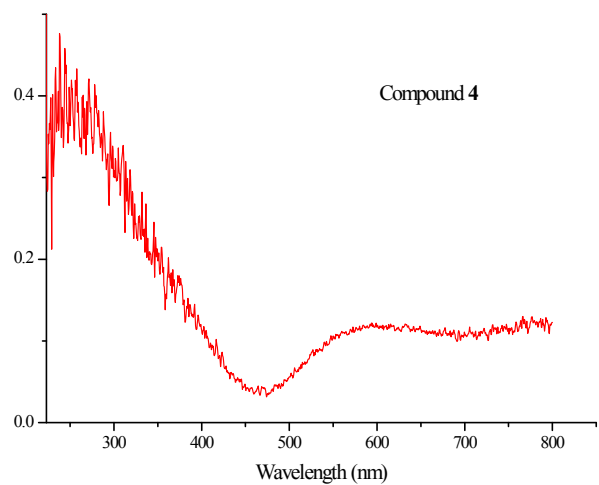

Fig. s7 solid state UV-Vis spectra of compounds 1-4.

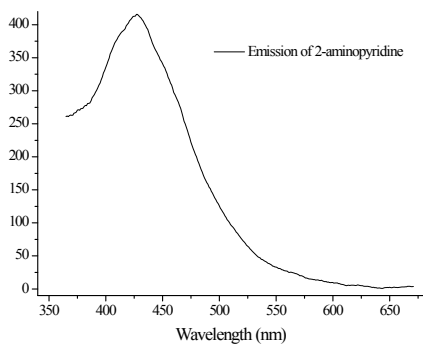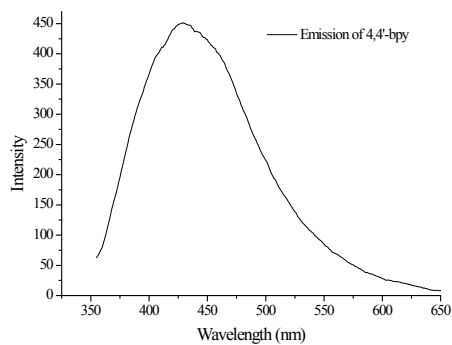

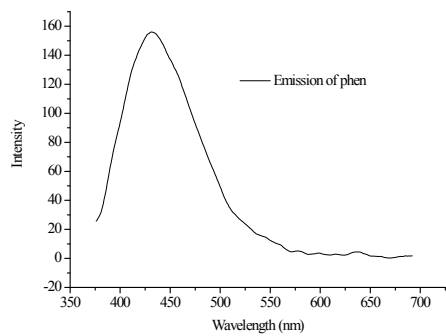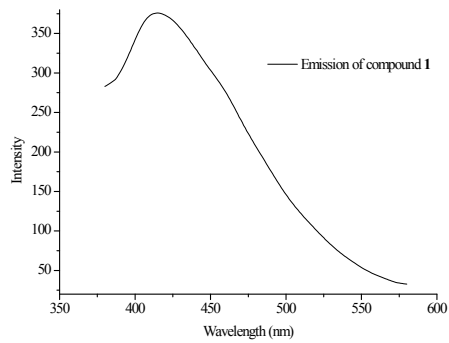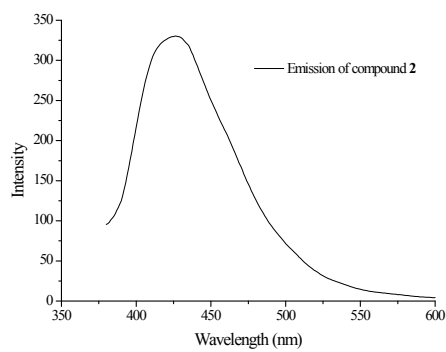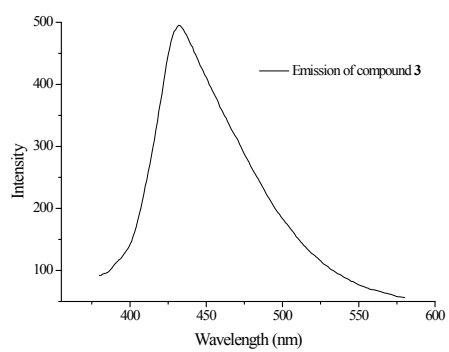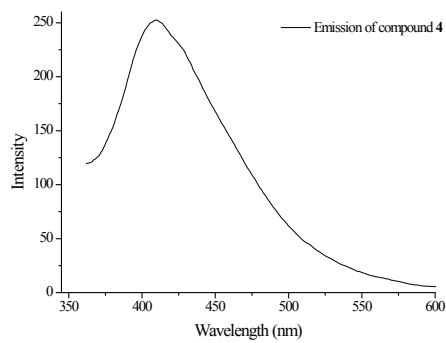

Fig. s8 photoluminescent properties of 2-aminopyridine, 4,4'-bpy, Phen and compounds 1-4.

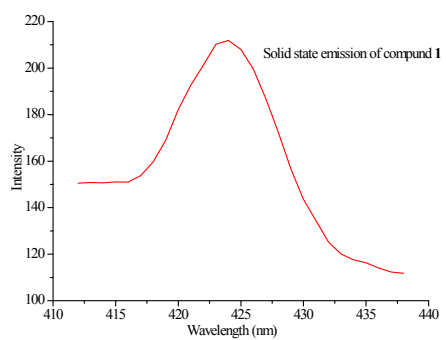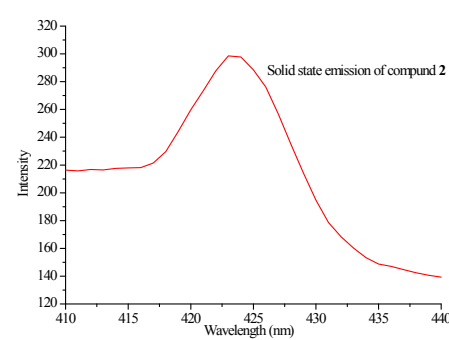

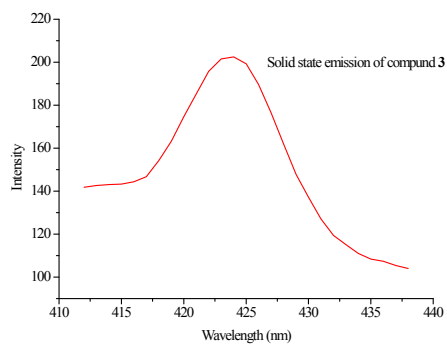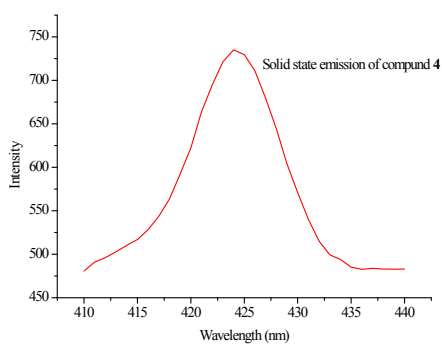

Fig. s9 Solid state photoluminescent properties of compounds **1-4**.

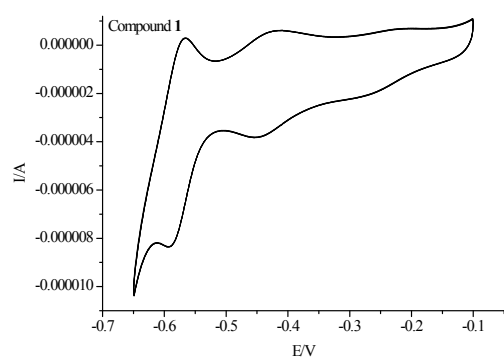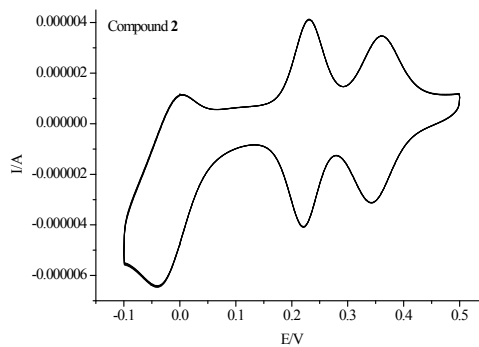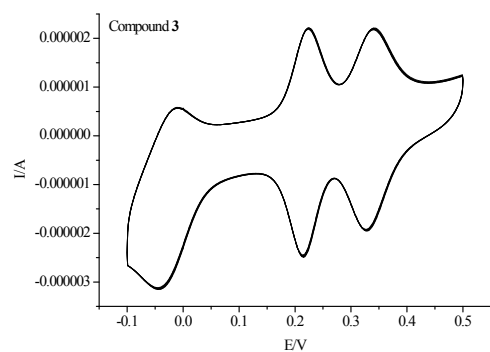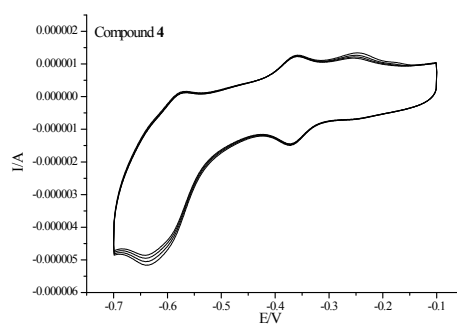

Fig. s10 cyclic voltammograms of DMSO solutions of compounds **1-4**.

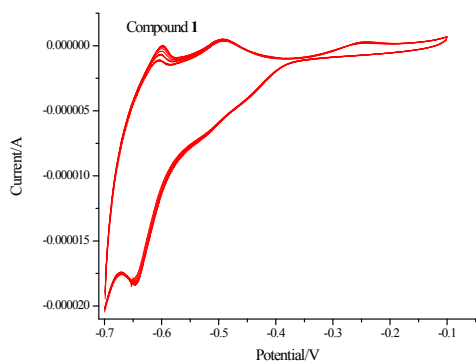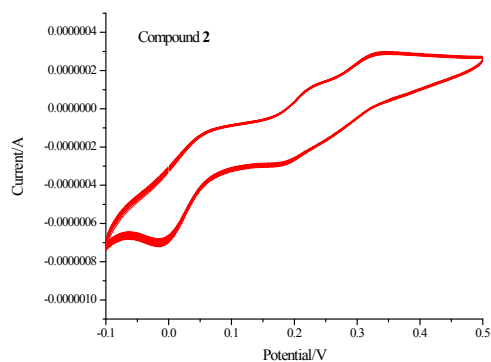

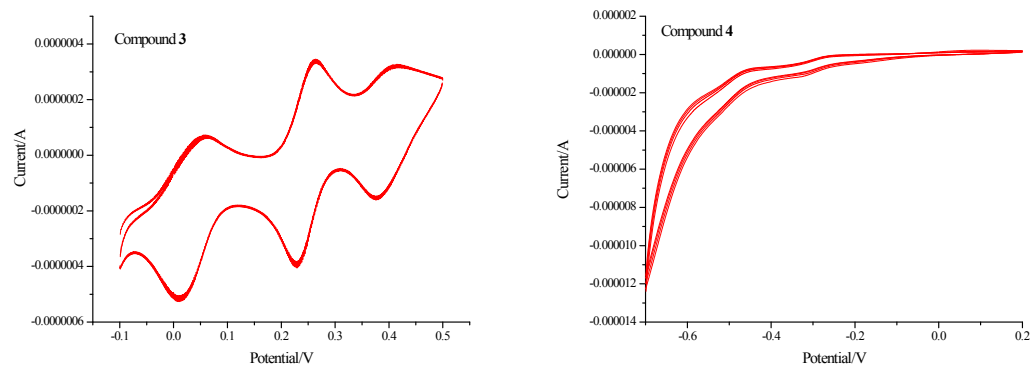

Fig. s11 cyclic voltammograms of CPEs of compounds 1-4.
